# Supplementary material for: Notch signaling functions in noncanonical juxtacrine manner in platelets to amplify thrombogenicity
Source: eLife. 2022 Oct 3;11:e79590. doi: 10.7554/eLife.79590 (PMC9629830; doi:10.7554/eLife.79590)
Supplement: Figure 1—figure supplement 1—source data 1. [file elife-79590-fig1-figsupp1-data1.xlsx]

## Sheet: Sheet1
Critical quantity (Cq) (Figure 1-figure supplement 1B)
	GAPDH	Actin	Notch-1	Notch-2	Notch-3	Notch-4
	21	23	27	34	35	39
	22	26	25	34	35	38
	19	21	26	33	32	37
	23	22	27	30	33	36
	21	20	27	34	36	37
	23	25	33	34	40	35
	20	24	28	36	33
