# Supplementary material for: Notch signaling functions in noncanonical juxtacrine manner in platelets to amplify thrombogenicity
Source: eLife. 2022 Oct 3;11:e79590. doi: 10.7554/eLife.79590 (PMC9629830; doi:10.7554/eLife.79590)
Supplement: Figure 1—figure supplement 2—source data 1. [file elife-79590-fig1-figsupp2-data1.xlsx]

## Sheet: Sheet1
Critical quantity (Cq) (Figure 1-figure supplement 2B)
	GAPDH	Actin	DLL-1	DLL-3	DLL-4	Jagged-1	Jagged-2
	21	23		34	25	30	30
	22	26		35	26	32	30
	19	21		34	26	33	29
	23	22	39	30	25	29	29
	21	20		33	25	30	30
	23	25		34	28	30	34
	20	24		28	26	33	31
