# Supplementary material for: Notch signaling functions in noncanonical juxtacrine manner in platelets to amplify thrombogenicity
Source: eLife. 2022 Oct 3;11:e79590. doi: 10.7554/eLife.79590 (PMC9629830; doi:10.7554/eLife.79590)
Supplement: Figure 1—source data 1. [file elife-79590-fig1-data1.xlsx]

## Sheet: Sheet1
Notch1 expression (Figure 1B)						Surface expression of Notch1 (Figure 1D)
	Resting	Thr	Puro+Thr				Resting	Thr
	0.343	0.389	0.212				127.17	170.15
	0.27	0.425	0.271				59.16	116.11
	0.246	0.368	0.222				52.72	109.87
	0.603	0.772	0.759
	0.604	0.769	0.473
DLL-4 expression (Figure 1F)						Surface expression of DLL-4 (Figure 1H)
	Resting	Thr	Puro+Thr				Resting	Thr
	0.2064	0.2021	0.1385				97.71	170.81
	0.2132	0.2445	0.2205				253.76	362.49
	0.2753	0.3654	0.3668				131.05	225.15
	0.2933	0.3856	0.332				174.52	321.12
	0.3865	0.4102	0.3616
	0.3401	0.5131	0.4188
	0.3609	0.4357	0.3215
	0.7619	0.8421	0.5637
	0.805	1.0569	0.7381
