# Supplementary material for: Notch signaling functions in noncanonical juxtacrine manner in platelets to amplify thrombogenicity
Source: eLife. 2022 Oct 3;11:e79590. doi: 10.7554/eLife.79590 (PMC9629830; doi:10.7554/eLife.79590)
Supplement: Figure 2—source data 1. [file elife-79590-fig2-data1.xlsx]

## Sheet: Sheet1
NICD expression (Figure 2B)
	Resting	DLL-4	DAPT+DLL-4	DBZ+DLL-4
	0.470988	3.74502	2.76281	2.72008
	0.310628	1.0091	0.704683	0.58668
	0.161812	1.11563	1.038	0.667918
	0.755277	3.19012	2.29057	2.11885
	0.823374	3.38916	2.6915	3.38699
	0.276934	1.75963	1.12211	1.35096
