# Supplementary material for: Notch signaling functions in noncanonical juxtacrine manner in platelets to amplify thrombogenicity
Source: eLife. 2022 Oct 3;11:e79590. doi: 10.7554/eLife.79590 (PMC9629830; doi:10.7554/eLife.79590)
Supplement: Figure 3—figure supplement 1—source data 1. [file elife-79590-fig3-figsupp1-data1.xlsx]

## Sheet: Sheet1
Fibrinogen (MFI) (Figure 3-figure supplement 1B)
	Resting	DLL-4	DAPT+DLL-4	DLL-1	Thr
	160.13	174.72	150.25	141.31	868.66
	37.12	117.26	97.97	52.62	449.56
	42.77	174.64	135.94	49.63	748.12
	88.3	475.49	236.44	62.06	645.38
	268.43	924.57	619.22	209.47	3400.5
	159.65	587.56	523.31	141.17	1376.53
	128.75	229.84	146.55	151.55	1570.81
	242.47	860.89	728.34	199.6	2531.75
	250.56	772.29	382.92	337.73	1337.36
