# Supplementary material for: Notch signaling functions in noncanonical juxtacrine manner in platelets to amplify thrombogenicity
Source: eLife. 2022 Oct 3;11:e79590. doi: 10.7554/eLife.79590 (PMC9629830; doi:10.7554/eLife.79590)
Supplement: Figure 3—figure supplement 2—source data 1. [file elife-79590-fig3-figsupp2-data1.xlsx]

## Sheet: Sheet1
Neutrophil-platelet aggregate (%) (Figure 3-figure supplement 2C)								Monocyte-platelet aggregate (%) (Figure 3-figure supplement 2D)
	Control	DLL-4	DAPT+DLL-4						Resting	DLL-4	DAPT+DLL-4
	4.9	6	4.8						9.9	13.9	9.8
	5.8	6.6	5						12.3	15.8	13.2
	8.3	11.6	10.3						15.4	17.7	15.5
	13.5	17	13.1						30.3	32.9	25.1
	3.6	5.3	5.8						8.3	23.6	24.8
	6.8	10.5	10.5						17.6	42.42	47.5
	11.6	20.3	23.6						7.3	22	21.9
	4	7	5.5						11.1	17.5	17.2
