# Supplementary material for: Notch signaling functions in noncanonical juxtacrine manner in platelets to amplify thrombogenicity
Source: eLife. 2022 Oct 3;11:e79590. doi: 10.7554/eLife.79590 (PMC9629830; doi:10.7554/eLife.79590)
Supplement: Figure 3—figure supplement 3—source data 1. [file elife-79590-fig3-figsupp3-data1.xlsx]

## Sheet: Sheet1
PAC-1 (MFI) (Figure 3-figure supplement 3B)
	Resting	DLL-4	Ro+DLL-4	LY+DLL-4	DLL-1
	24.34	39.76	17.32	11.89	21.73
	30.97	62.02	20.91	11.65	24.26
	23.3	42.23	16.55	10.87	23.31
	16.14	50.55	18.71	10.91	15.49
