# Supplementary material for: Notch signaling functions in noncanonical juxtacrine manner in platelets to amplify thrombogenicity
Source: eLife. 2022 Oct 3;11:e79590. doi: 10.7554/eLife.79590 (PMC9629830; doi:10.7554/eLife.79590)
Supplement: Figure 3—source data 1. [file elife-79590-fig3-data1.xlsx]

## Sheet: Sheet1
PAC-1 (Figure 3B)								P-Selectin (Figure 3D)
	Resting	DLL-4	DAPT+DLL-4	DLL-1	Thr				Resting	DLL-4	DAPT+DLL-4	DLL-1	Thr
	9.25	31.01	8.37	8.13	64.07				598.19	653.42	551.08	486.49	995.57
	18.04	49.08	29.9	18.05	24.27				301.81	430.72	377.4	361.25	417.05
	3.63	12.1	9.45	16.5	17.33				432	540.28	478.41	464.2	712.79
	7.06	35.1	15.36	9.67	68.48				336.53	435.63	318.26	318.91	1223.34
	9.57	39.12	22.83	9.32	205				457.5	499.89	381.21	415.42	694.88
	6.9	17.46	13.67	7.4	14.61				605.03	725.38	612.62	512.74	1352.71
	52.31	158.21	123.01	28.32	123.81				249.89	337.06	309.78	212.18	299.4
	12.45	19.6	14.39	12.97	13.3				519.88	526.51	515.72	515.56	537.73
	7.52	26.79	22.6	7.68	36.88				479.38	593.89	416.35	473.71	998.03
	7.35	19.94	12.52	7.96	45.8
	6.25	23.65	24.4	7.38	25.15
	32.25	98.42	48.86	23.23	154.35
ATP Release (Figure 3E)								[Ca2+]i (Figure 3G)
	Resting	DLL-4	DAPT+DLL-4						Resting	EGTA	DLL-4	EGTA+DLL-4
	52	137	59						83.93	35.549	99.569	41.572
	176	265	106						93.8862	32.98	138.25	41.97
	94	167	82						57.825	28.292	103.872	31.693
	106	194	97						59.38	24.12	71.164	35.472
									33.088	18.387	56.854	23.71
PEVs Count (Figure 3H)								p-PI3K/PI3K (Figure 3K)						pAKT/AKT (Figure 3M)
	Resting	DLL-4	DAPT+DLL-4	DBZ+DLL-4					Resting	DLL-4	DAPT+DLL-4				Resting	DLL-4	DAPT+DLL-4
	0.94	5.13	3.55	2.29					0.35	1.382	1.09				0.255	0.603	0.6
	1.64	7.82	2.93	2.84					0.334	0.891	0.513				0.293	1.111	0.586
	0.97	4.79	2.91	4.47					0.132	0.871	0.596				0.264	0.59	0.312
	1.19	6.39	2.99	2.95											0.346	0.531	0.394
	0.78	2.97	1.44	1.73											0.068864	0.593865	0.208103
	0.98	2.5	1.8	1.08											0.331568	0.920928	0.509188
	1.18	5.56	3.51	4.25											0.592808	0.698033	0.588096
	1.2	2.95	1.62	2.5
