# Supplementary material for: Notch signaling functions in noncanonical juxtacrine manner in platelets to amplify thrombogenicity
Source: eLife. 2022 Oct 3;11:e79590. doi: 10.7554/eLife.79590 (PMC9629830; doi:10.7554/eLife.79590)
Supplement: Figure 4—figure supplement 1—source data 1. [file elife-79590-fig4-figsupp1-data1.xlsx]

## Sheet: Sheet1
Aggregation % (Figure 4-figure supplement 1B)
	Rabbit IgG+Thr	Anti-DLL-4 Ab 2 μg/ml+Thr	Anti-DLL-4 Ab 5 μg/ml+Thr	Anti-DLL-4 Ab 10 μg/ml+Thr
	70	51	31	15
	70	63	56	35
	67	36	4	1
