# Supplementary material for: Notch signaling functions in noncanonical juxtacrine manner in platelets to amplify thrombogenicity
Source: eLife. 2022 Oct 3;11:e79590. doi: 10.7554/eLife.79590 (PMC9629830; doi:10.7554/eLife.79590)
Supplement: Figure 4—source data 1. [file elife-79590-fig4-data1.xlsx]

## Sheet: Sheet1
Aggregation % (Figure 4B)						PAC-1 (Figure 4D)							P-Selectin (Figure 4F)
	Thr	DLL-4+Thr	DAPT+DLL-4+Thr				Resting	Thr	DLL-4+Thr	DAPT+DLL-4+Thr				Resting	Thr	DLL-4+Thr	DAPT+DLL-4+Thr
	15	75	13				32.25	118.54	173.78	124.41				479.38	729.57	805.95	649.75
	61	73	14				8.53	23.84	74.52	30.69				483.84	644.49	922.44	734.68
	25	65	39				9.71	38.5	62.76	15.12				444.22	776.39	840.27	560.39
	37	79	65				10.13	105.34	115.46	63.24				571	600.68	748.74	529
	65	74	52				16.18	42.05	138.57	118.77				29.41	656.85	598.56	447.19
							22.24	193.73	336.61	188.14				115.2	377.59	456.01	332.4
							31.62	259.42	338.41	286.91				124.78	830.87	1140.87	747.41
							62.92	140.96	200.89	177.37				83.58	845.93	841.7	686.54
							30.33	31.03	44.78	30.35				179.3	345.99	515.6	583.77
														201.36	260.56	308.12	252.38
Aggregation % (Figure 4H)						PEVs Count (Figure 4I)
	Thr	Rabbit IgG+Thr	Anti-DLL-4 Ab+Thr				Thr	Rabbit IgG+Thr	Anti-DLL-4 Ab+Thr
	59	51	10				3.11	3.13	1.45
	65	68	5				1.71	2.51	1.13
	65	50	21				1.41	1.73	0.64
	48	36	1
