# Supplementary material for: Notch signaling functions in noncanonical juxtacrine manner in platelets to amplify thrombogenicity
Source: eLife. 2022 Oct 3;11:e79590. doi: 10.7554/eLife.79590 (PMC9629830; doi:10.7554/eLife.79590)
Supplement: Figure 5—figure supplement 1—source data 1. [file elife-79590-fig5-figsupp1-data1.xlsx]

## Sheet: Sheet1
Aggregation % (Figure 5-figure supplement 1B)
	Thr	DBZ + Thr
	80	71
	82	80
	81	73
	81	73
	58	30
	70	36
	87	60
	77	67
