# Supplementary material for: Notch signaling functions in noncanonical juxtacrine manner in platelets to amplify thrombogenicity
Source: eLife. 2022 Oct 3;11:e79590. doi: 10.7554/eLife.79590 (PMC9629830; doi:10.7554/eLife.79590)
Supplement: Figure 5—figure supplement 2—source data 1. [file elife-79590-fig5-figsupp2-data1.xlsx]

## Sheet: Sheet1
PAC-1 (MFI) (Figure 5-figure supplement 2B)						PAC-1 (MFI) (Figure 5-figure supplement 2D)
	Resting	Thr 1U/ml	DAPT+Thr 1U/ml				Resting	Thr 0.1U/ml	DAPT+Thr 0.1U/ml
	7.06	68.48	55.63				7.06	13.68	12.28
	9.57	205.28	185.4				6.9	10.69	6.7
	6.9	14.61	7.59				2.224	19.373	13.895
	5.231	12.381	10.873				3.162	25.942	21.303
	8.05	53.61	30.64				30.33	31.03	30.35
	8.99	143.42	115.57				7.31	25.31	12.67
	6.22	104.43	105.56				8.05	19.55	14.92
							8.99	18.1	15.88
Fibrinogen (MFI) (Figure 5-figure supplement 2F)						Fibrinogen (MFI) (Figure 5-figure supplement 2H)
	Resting	Thr 1U/ml	DAPT+Thr 1U/ml				Resting	Thr 0.5U/ml	DAPT+Thr 0.5U/ml
	172.49	1570.81	1436.79				172.49	1423.63	827.28
	242.47	2531.75	940.28				242.47	1528.11	950.59
	250.56	1337.36	193.13				250.56	945.42	695.81
	88.3	645.38	790.87				19.12	1375.5	1328.8
	234.45	3396.07	2088.77				11.08	1550.76	1210.66
	135.6	1339.88	1322
	25.56	1910	1193.25
	19.12	1125.7	988.63
	11.08	1200.75	826.49
