# Supplementary material for: Notch signaling functions in noncanonical juxtacrine manner in platelets to amplify thrombogenicity
Source: eLife. 2022 Oct 3;11:e79590. doi: 10.7554/eLife.79590 (PMC9629830; doi:10.7554/eLife.79590)
Supplement: Figure 5—figure supplement 3—source data 1. [file elife-79590-fig5-figsupp3-data1.xlsx]

## Sheet: Sheet1
P-Selectin (MFI) (Figure 5-figure supplement 3B)							P-Selectin (MFI) (Figure 5-figure supplement 3D)
	Resting	Thr 1U/ml	DAPT+Thr 1U/ml					Resting	Thr 0.1U/ml	DAPT+Thr 0.1U/ml
	712.79	1233.34	694.88					432.4	548.53	511.35
	691.64	1068.64	541.05					124.78	830.87	757.25
	605.03	1352.71	707.91					83.58	845.93	677.79
	479.38	998.03	949.51					201.36	260.56	229.03
	38	1397.32	1178.44					38.63	475.08	421.23
	88.88	1219.44	1201.1					25.26	226.84	170.31
	27.74	1047.89	1027.05
	34.71	881.84	841.11
	38.16	1002.54	936.86
