# Supplementary material for: Notch signaling functions in noncanonical juxtacrine manner in platelets to amplify thrombogenicity
Source: eLife. 2022 Oct 3;11:e79590. doi: 10.7554/eLife.79590 (PMC9629830; doi:10.7554/eLife.79590)
Supplement: Figure 5—figure supplement 4—source data 1. [file elife-79590-fig5-figsupp4-data1.xlsx]

## Sheet: Sheet1
PEVs Count (Figure 5-figure supplement 4)
	Resting	Thr 1U/ml	DAPT+Thr 1U/ml
	0.98	2.32	0.86
	1.18	3.6	1.14
	1.2	2.85	1.34
