# Supplementary material for: Notch signaling functions in noncanonical juxtacrine manner in platelets to amplify thrombogenicity
Source: eLife. 2022 Oct 3;11:e79590. doi: 10.7554/eLife.79590 (PMC9629830; doi:10.7554/eLife.79590)
Supplement: Figure 5—source data 1. [file elife-79590-fig5-data1.xlsx]

## Sheet: Sheet1
Agrregation % (Figure 5B)					Aggregation % (Figure 5D)				Aggregation % (Figure 5F)				Aggregation Ohms (Figure 5H)
	Thr	DAPT+Thr				TRAP	DAPT+TRAP			Coll	DAPT+Coll			TRAP	DAPT+TRAP
	80	65				82	66			36	14			17	8
	81	62				74	47			53	12			15	9
	81	61				81	68			67	18			16	9
	58	25				74	65
	70	58				64	54
	87	40
	77	67
Aggregation Ohms (Figure 5J)					Luminescence % (Figure 5K)				Neutrophil-platelet aggregate % (Figure 5M)					Monocyte-platelet aggregate % (Figure 5O)
	Coll	DAPT+Coll				Thr	DAPT+Thr			Control	TRAP	DAPT+TRAP			Control	TRAP	DAPT+TRAP
	14	11				91	53			6.4	53.2	34			10.1	68.1	63
	18	9				26	2			5.1	16.7	14.8			11.8	38.1	36.1
	15	15				96	88			6.4	28.6	21.9			11.2	53.1	46.4
						64	30			5.9	41.7	27.1			20	67.4	57
										9.4	28.6	24.2			38.6	67.4	62.8
										3.6	15.8	11.1			7.9	38.5	37
										6.8	27.4	21.1			8.3	62.1	40.9
										9.8	13.7	15.3			7.3	48.8	46.4
															11.1	53.1	48.4
