# Supplementary material for: Notch signaling functions in noncanonical juxtacrine manner in platelets to amplify thrombogenicity
Source: eLife. 2022 Oct 3;11:e79590. doi: 10.7554/eLife.79590 (PMC9629830; doi:10.7554/eLife.79590)
Supplement: Figure 6—figure supplement 1—source data 1. [file elife-79590-fig6-figsupp1-data1.xlsx]

## Sheet: Sheet1
Percent patent arterioles (Figure 6-figure supplement 1)
		Control	DAPT
	40	0
	40	0
	34	1
	20.5	1
	40	0
	22	1
	40	0
	27	1
	40		0
	40		0
	26.5		1
	28		1
	40		0
	40		0
	18		1
	14		1
