# Supplementary material for: Notch signaling functions in noncanonical juxtacrine manner in platelets to amplify thrombogenicity
Source: eLife. 2022 Oct 3;11:e79590. doi: 10.7554/eLife.79590 (PMC9629830; doi:10.7554/eLife.79590)
Supplement: Figure 6—source data 1. [file elife-79590-fig6-data1.xlsx]

## Sheet: Sheet1
Time to first thrombus (minutes) (Figure 6B)					Thrombus growth rate (fold change per minute) (Figure 6C)							Time to occlusion (minutes) (Figure 6D)
	Control	DAPT				Control	DAPT						Control	DAPT
	3.5	3.5				0.326	0.314						45	45
	6.5	10				0.508	0.174						45	45
	6.8	9.5				0.363	0.333						34	26.5
	3.1	10				0.403	0.055						20.5	28
	4	9				0.573	0.124						45	45
	3.6	5.45				0.6684	0.3529						22	45
	3	8.6				0.5069	0.4665						45	18
	3.5	3				0.59	0.5383						27	14
Thrombus formation (% area covered) (Figure 6F)					Reaction Time (min) (Figure 6H)					Maximum amplitude (mm) (Figure 6I)
	Control	DAPT				Control	DAPT				Control	DAPT
	40.382	23.6498				6.6	9.8				58.5	52.5
	49.2646	22.9082				4.7	5.2				56.9	51
	52.4656	22.2394				4.2	6.1				62.7	60.7
	51.0784	39.2222				6.8	9.9				69.6	63.8
						5.1	5.4				64.5	61
